# **Yellow strawberries and red bananas: The influence of object-colour knowledge on emerging object representations in the brain**

**Lina Teichmann<sup>1,2</sup>, Genevieve L. Quek<sup>5</sup>, Amanda K. Robinson<sup>1,2,3</sup>, Tijl Grootswagers<sup>1,2,3</sup>, Thomas A. Carlson<sup>2,3</sup>, Anina N. Rich<sup>\*1,2,4</sup>**

1| Perception in Action Research Centre & Department of Cognitive Science, Macquarie University, Sydney, Australia

2| ARC Centre of Excellence in Cognition & its Disorders, Macquarie University, Sydney, Australia

3| School of Psychology, University of Sydney, Australia

4| Centre for Elite Performance, Training and Expertise, Macquarie University, Sydney, Australia

5| Donders Institute for Brain, Cognition and Behaviour, Radboud University, Nijmegen, The Netherlands

\*Corresponding author's email: [anina.rich@mq.edu.au](mailto:anina.rich@mq.edu.au)

Keywords: Object-colour knowledge, feature binding, MEG, MVPA, decoding

## **ACKNOWLEDGEMENTS:**

This study was conducted at the KIT-Macquarie Brain Research (MEG) Laboratory. The research was supported by the Australian Research Council (ARC) Centre of Excellence in Cognition and its Disorders, International Macquarie University Research Training Program Scholarships to LT & TG, an ARC Future Fellowship (FT120100816) and an ARC Discovery project (DP160101300) to TC. ANR has funding from the ARC (DP12102835 and DP170101840). The authors acknowledge the University of Sydney HPC service for providing High Performance Computing resources.

1  
2  
3  
4  
5  
6  
7  
8  
9  
10  
11  
12  
13  
14

## Abstract

The ability to rapidly and accurately recognise complex objects is a crucial function of the human visual system. Successful object recognition requires binding incoming visual features such as colour and form into specific neural representations that can be compared to our pre-existing knowledge about the world. For some objects, typical colour is a central feature for recognition; for example, a banana is typically yellow. Here, we examine the timecourse over which features such as colour and form are bound together by using multivariate pattern analyses of time-resolved neuroimaging (magnetoencephalography) data. Consistent with a traditional hierarchical view, we show that single object features are processed before the features are bound into a coherent object that can be compared with existing, conceptual object representations. Our data also suggest that colour processing is be affected by the conjunction of object and colour. These results provide new insights into the interaction between our knowledge about the world and incoming visual information.

## 15 Introduction

16 Successful object recognition depends critically on comparing incoming perceptual  
17 info with existing internal representations (Albright, 2012; Clarke & Tyler, 2015). A central  
18 feature of many objects is colour, which can be a highly informative cue about an object's  
19 identity. For example, when we see a small oval fruit that is yellow in colour, we know that we  
20 are looking at a lemon and not a lime. Although a lot is known about colour perception itself,  
21 we know comparatively less about how object-colour knowledge interacts with colour  
22 perception and object processing. Here, we apply multivariate pattern analyses (MVPA) to  
23 Magnetoencephalography (MEG) data to examine how the activation of object-colour  
24 knowledge unfolds over time.

25 There is substantial behavioural evidence that our existing knowledge about an  
26 object's typical colour interacts with processing perceptual object features. From the  
27 behavioural literature, we know that representations of canonically-coloured objects inherently  
28 include colour as a strong defining feature, such that conflicting colour information (e.g., a red  
29 banana) slows recognition (Nagai & Yokosawa, 2003; Tanaka & Presnell, 1999, for a meta-  
30 analysis see Bramão, Reis, Petersson, & Faísca, 2011). Neuroimaging and neural stimulation  
31 experiments suggests that this *binding* of incoming perceptual information and object-colour  
32 knowledge takes place in the anterior temporal lobe (ATL) (Chiou, Sowman, Etchell, & Rich,  
33 2014; Coutanche & Thompson-Schill, 2014; Pobric, Jefferies, & Lambon Ralph, 2010). In one  
34 study, for example, brain activation patterns evoked by recalling a known object's colour and  
35 its shape could be distinguished in brain areas that have consistently been associated with  
36 those features, namely V4 and lateral occipital cortex (LOC) respectively (Coutanche &  
37 Thompson-Schill, 2014). In contrast, recalling an object's particular conjunction of colour *and*  
38 shape, that is, a 'bound' representation, could only be distinguished in the anterior temporal  
39 lobe (ATL). Similarly, results from patient work (Patterson, Nestor, & Rogers, 2007) and  
40 transcranial magnetic stimulation studies (Chiou et al., 2014; Pobric et al., 2010) point towards

41 the ATL as a hub for conceptual knowledge (for a recent review see Ralph, Jefferies,  
42 Patterson, & Rogers, 2017). While these results suggest that the ATL carries conceptual  
43 information, it is unclear how conceptual-level processing interacts dynamically with  
44 perception.

45 Time-resolved data, such as Electroencephalography (EEG) or MEG data, can give an  
46 understanding of the stage of processing at which incoming perceptual information is  
47 influenced by stored object-knowledge. Previous EEG studies have examined the temporal  
48 dynamics of object-colour knowledge as an index of the integration of incoming visual  
49 information and prior knowledge (Lloyd-Jones, Roberts, Leek, Fouquet, & Truchanowicz,  
50 2012; Lu et al., 2010; Proverbio, Burco, del Zotto, & Zani, 2004). For example, Lloyd-Jones et  
51 al. (2012) showed participants images of everyday objects coloured correctly (e.g., a yellow  
52 banana) or incorrectly (e.g., a purple banana) while recording EEG data. Their results show  
53 that shape information modulated the neural responses at around 170ms (i.e., component  
54 N1), the combination of shape and colour affected the signal at 225ms (i.e., component P2),  
55 and the typicality of object-colour pairing modulated components approximately 225 and  
56 350ms after stimulus onset (i.e., P2 and P3). These findings suggest that shape information  
57 activates typical object-colour associations and that bound colour *and* shape features are  
58 processed later than shape or colour alone. This suggests that the initial stages of object  
59 recognition may be purely based on shape, with the interactions with object-colour knowledge  
60 coming into play at a much later stage, perhaps as late as during response selection.

61 In these previous studies, the focus was on evoked components, which cannot tell us  
62 about the type of information that is contained in the neural signal. In the present study, we  
63 examine the temporal aspects underlying object-colour processing using time-resolved  
64 multivariate analyses of MEG data, which allows us to explore when particular types of  
65 information (e.g., shape, colour, congruency) influence neural activity. This provides a unique  
66 insight into the temporal dynamics of object-knowledge and object-feature binding by showing

67 how existing knowledge about an object's typical colour affects perceptual processing of that  
68 object's features. We presented participants with coloured objects that were either congruent  
69 (e.g., yellow banana) or incongruent (e.g., red banana). Using machine learning algorithms,  
70 we determined the timepoint at which neural activity differed between congruently and  
71 incongruently coloured objects, which reflects the time by which binding of colour and shape  
72 must have occurred. By further contrasting the neural responses evoked by congruent and  
73 incongruently coloured objects with those evoked by objects without colour (e.g., greyscale  
74 banana) and colours without familiar objects (colours overlaid on abstract shapes), we also  
75 examine whether existing knowledge about an object's typical colour influences perceptual  
76 processing of those features. Overall, our findings elucidate the timecourse of interactions  
77 between incoming visual information and prior knowledge in the brain, demonstrating the  
78 importance of what we know in determining what we see.

79

80

## Methods

81 *Participants.* 20 healthy volunteers (11 female, mean age = 28.9 years, SD = 6.9 years,  
82 1 left-handed) participated in the study. All participants reported accurate colour-vision and  
83 had normal or corrected-to-normal visual acuity. Participants gave informed consent before  
84 the experiment started and were financially compensated. The study was approved by the  
85 Macquarie University Human Research Ethics Committee.

86 *Stimuli.* We identified five real world objects that previous studies have shown to be  
87 strongly associated with each of four different colours (red, green, orange and yellow; see  
88 Figure 1) (Bannert & Bartels, 2013; Joseph, 1997; Lloyd-Jones et al., 2012; Naor-Raz, Tarr,  
89 & Kersten, 2003; Tanaka & Presnell, 1999; Therriault, Yaxley, & Zwaan, 2009). Each colour  
90 category had one manmade object (e.g., fire hydrant), one living object (e.g., ladybird), and  
91 three fruits or vegetables (e.g., strawberry, tomato, cherry). We sourced two exemplar images  
92 for each object class, resulting in 10 images for each colour, 40 individual images in total. We

93 then created incongruently coloured objects by swapping the colours (e.g., green strawberry,  
94 orange broccoli). For both congruent and incongruent stimuli, we did not use the native colours  
95 from the images themselves, but instead overlaid pre-specified hues on desaturated  
96 (greyscale) images that were equated for luminance using the SHINE toolbox (Willenbockel  
97 et al., 2010). This ensured that congruent and incongruent stimuli were matched in the way  
98 the texture and shape of the object interacted with the colour overlay. A greyscale image  
99 overlaid with its canonically associated colour (e.g., yellow hue applied to greyscale banana)  
100 resulted in a congruent object; a greyscale image overlaid with a colour different from its  
101 canonically associated colour (e.g., red hue applied to greyscale banana) resulted in an  
102 incongruent object. Every congruent object exemplar had a single colour-matched incongruent  
103 partner. For example, we used a specific shade of red and added it to the grey-scale images  
104 of the strawberries to make the congruent strawberries and overlaid it onto the lemons to  
105 make the incongruent lemons. We then took a specific shade of yellow and overlaid it on the  
106 lemons to make the congruent lemon exemplar, and onto the strawberries to make the  
107 incongruent strawberry exemplar. That means, overall, we have the identical shapes and  
108 colours in the congruent and the incongruent condition, a factor that is crucial to ensure our  
109 results cannot be explained by features other than colour congruency. The only difference  
110 between these key conditions is that the colour-shape combination is either typical (congruent)  
111 or atypical (incongruent).

112 This procedure resulted in 40 congruent objects (10 of each colour), and 40  
113 incongruent objects (10 of each colour, Figure 1). We added two additional stimulus types to  
114 this set: the full set of 40 greyscale images, and a set of 10 different angular abstract shapes,  
115 coloured in each of the four hues for a set of 40 (see Figure 1). As is clear in Figure 1, the  
116 colours of the abstract shapes appeared brighter than the colours of the objects, this is  
117 because the latter were made by overlaying hue on greyscale, whereas the shapes were  
118 simply coloured. As our principle goal was to ensure that the congruent objects appeared to

119 have their typical colouring, we did not match the overall luminance of the coloured stimuli.  
120 For example, if we equated the red of a cherry with the yellow of a lemon, neither object would  
121 look typically coloured. Thus, each specific colour pair is not equated for luminance; however  
122 we have the same colours across different conditions, which ensures this cannot form a clue  
123 for the classification algorithm in distinguishing our categories.

124 All stimuli were presented at a distance of 114cm and image size varied randomly from  
125 trial to trial by 2 degrees visual angle resulting in the visual angle of ~4.3 – 6.3 degrees. This  
126 added visual variability to reduce low-level featural differences not related to colour between  
127 images.

128 *Procedure.* Before entering the magnetically shielded room for MEG recordings, an  
129 elastic cap with five marker coils was placed on the participant's head. We recorded head  
130 shape with a digitiser pen and used these marker coils to measure the head position within  
131 the magnetically shielded room at the start of the experiment, half way through and at the end.

132 In the main task (Figure 1B), participants completed eight blocks of 800 trials each.  
133 Each individual stimulus appeared 40 times over the course of the experiment. Each stimulus  
134 was presented centrally for 450ms with a black fixation dot on top of it. To keep participants  
135 attentive, after every 80 trials, a target image was presented until a response was given  
136 indicating whether this stimulus had appeared in the immediately previous block of trials or  
137 not (50% present vs absent). The different conditions (congruent, incongruent, grey-scale,  
138 abstract shape) were randomly intermingled throughout each block, and the target was  
139 randomly selected each time. On average, participants performed with 90% (SD=5.4%)  
140 accuracy.

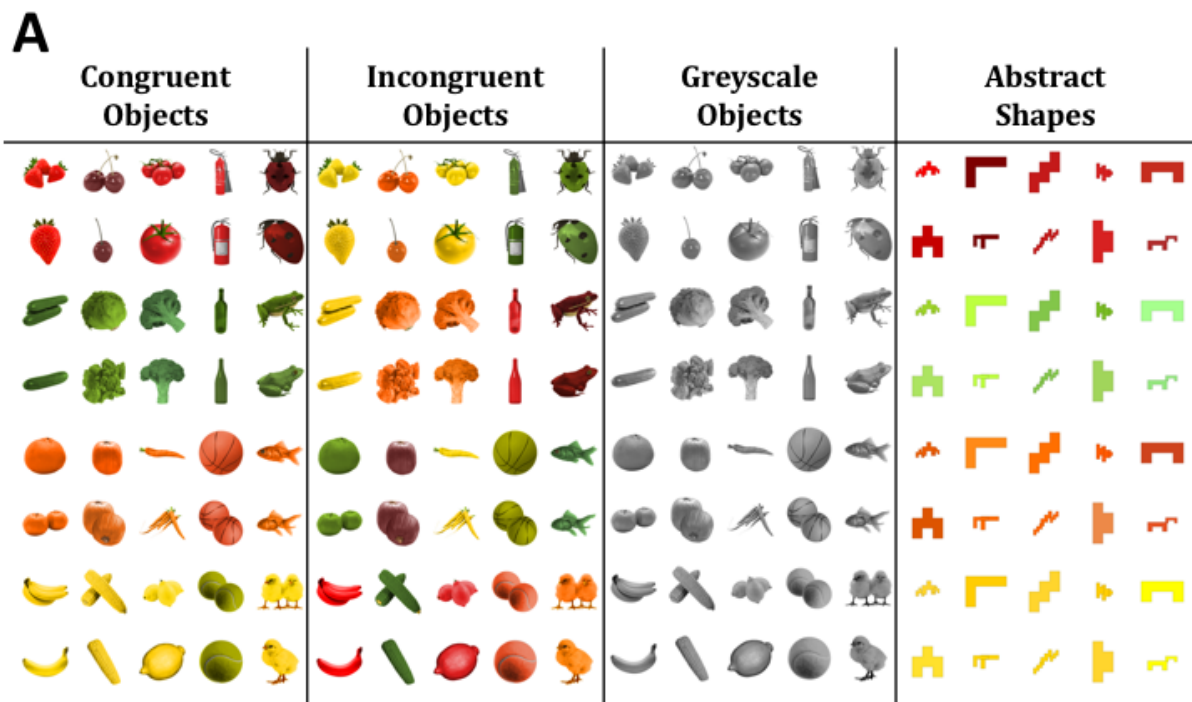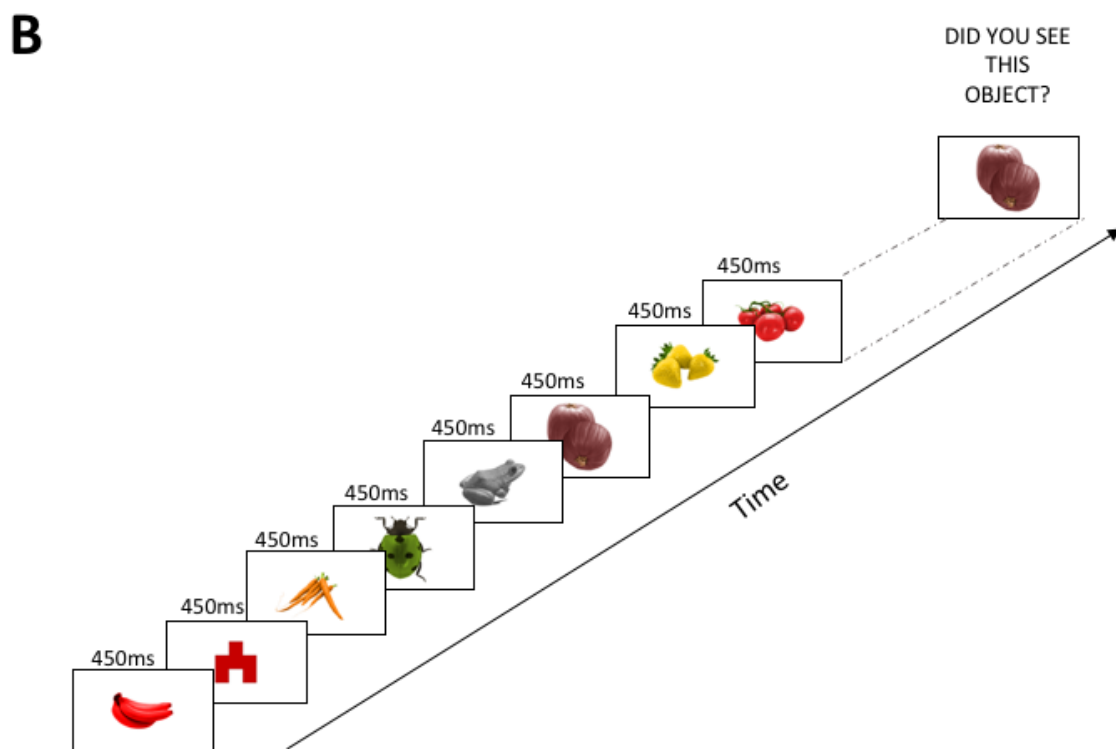

141

142 Figure 1. (A) shows all stimuli used in this experiment. The same objects were used in the  
143 congruent, incongruent, and greyscale conditions. There were two exemplars of each objects.  
144 Colours in the congruent and incongruent condition were matched. The abstract shapes were  
145 identical across colour categories. (B) shows an example sequence of the main task.  
146 Participants viewed each object for 450ms. After each run, one object was displayed and  
147 participants had to indicate whether they had seen this object in the previous run or not.



148           After completing the main blocks, we collected behavioural object-naming data to test  
149 for a behavioural congruency effect with our stimuli. On the screen, participants saw each of  
150 the objects again (congruent, incongruent or grey-scale) in a random order and were asked  
151 to name the objects as quickly as possible. As soon as voice onset was detected, the stimulus  
152 disappeared. We marked stimulus-presentation time with a photodiode and recorded voice-  
153 onset with a microphone. Seventeen participants completed three blocks of this reaction time  
154 task, one participant completed two blocks, and for two participants we could not record any  
155 reaction times. Each block contained all congruent, incongruent and grey-scale objects  
156 presented once.

157           Naming reaction times were defined as the difference between stimulus-onset and  
158 voice-onset. Trials containing naming errors and microphone errors were not analysed. We  
159 calculated the median naming time for each exemplar for each person and then compared the  
160 naming times for each of the congruent, incongruent and greyscale conditions.

161           *Apparatus.* The neuromagnetic recordings were conducted with a whole-head axial  
162 gradiometer MEG (KIT, Kanazawa, Japan), containing 160 axial gradiometers. We recorded  
163 the MEG signal with a 1000Hz frequency. An online low-pass filter of 200Hz and a high-pass  
164 filter of 0.03Hz were used. All stimuli were projected on a translucent screen mounted on the  
165 ceiling of the magnetically shielded room. Stimuli were presented using MATLAB with  
166 Psychtoolbox extension (Brainard, 1997; Brainard & Pelli, 1997; Kleiner et al., 2007). Parallel  
167 port triggers and the signal of a photodiode were used to mark the beginning and end of each  
168 trial. A Bimanual 4-Button Fiber Optic Response Pad (Current Designs, Philadelphia, USA)  
169 was used to record the responses. Head shape recordings were completed with a Polhemus  
170 Fastrak digitiser pen (Colchester, USA).

171           *Pre-processing.* FieldTrip (Oostenveld, Fries, Maris, & Schoffelen, 2011) was used to  
172 pre-process the data. The data were downsampled to 200Hz and then epoched from -100 to

173 450ms relative to stimulus onset. We did not conduct any further pre-processing steps  
174 (filtering, channel selection, trial-averaging etc.) to keep the data in its rawest possible form.

175 *Decoding Analyses.* For all our decoding analyses, patterns of brain activity were  
176 extracted across MEG sensors at every timepoint, for each participant separately. We used a  
177 regularised linear discriminant analysis (LDA) classifier which was trained to distinguish the  
178 conditions of interest. We then used independent test data to assess whether the classifier  
179 could predict the condition above chance in the new data. We conducted training and testing  
180 at every timepoint and tested for significance using random-effects Monte Carlo cluster  
181 (TFCE; Smith & Nichols, 2009) statistics, corrected for multiple comparisons using the max  
182 statistic across time points (Maris & Oostenveld, 2007). Note that our aim was not to achieve  
183 the highest possible decoding accuracy (i.e., “classification for prediction”, Hebart & Baker,  
184 2017), but rather to test whether the classifier could predict the conditions above chance at  
185 any of the timepoints (i.e., “classification for interpretation”, Hebart & Baker, 2017). Therefore,  
186 we followed a minimal preprocessing pipeline and performed our analyses on a single-trial  
187 basis. Classification accuracy above chance indicates that the MEG data contains information  
188 that is different for the categories. We used the CoSMoMvpa toolbox (Oosterhof, Connolly,  
189 & Haxby, 2016) to conduct all our analyses.

190 We ran three decoding analyses to examine how the typicality of object-colour  
191 combinations influences colour and shape processing over time. By examining the timecourse  
192 of object-feature binding, these analyses allow us to track the interaction between object-  
193 colour knowledge and object representations in the brain. First, we tested whether activation  
194 patterns evoked by congruently coloured objects (e.g., red strawberry) differ from activation  
195 patterns evoked by incongruently coloured objects (e.g., yellow strawberry). Any differential  
196 response that depends on whether a colour is typical or atypical for an object (a congruency  
197 effect) requires the perceived shape and colour to be bound and compared to a conceptual  
198 object representation activated from memory. We trained the classifier on all congruent and

199 incongruent trials *except* for trials corresponding to one pair of matched exemplars (e.g., all  
200 instances of congruent and incongruent strawberries and congruent and incongruent  
201 bananas). We then tested the classifier using only the left-out exemplar pairs. We repeated  
202 this process until each matched exemplar pair had been left out (i.e., used as test data) once.  
203 Leaving an exemplar pair out ensures that there are identical shapes and colours for both  
204 classes (congruent and incongruent) in both the training and the testing set, and that the  
205 stimuli of the test set have different shape characteristics than any of the training objects. As  
206 such, the only distinguishing feature between the conditions is the *conjunction* of shape and  
207 colour features, which defines congruency. This allows us to compare directly whether (and  
208 at which timepoint) object-colour knowledge interacts with stored object representations.

209         In a second decoding analysis, we examined whether the conjunction of object and  
210 colour influenced colour perception itself. Perceiving a strongly associated shape in the  
211 context of viewing a certain colour might lead to a more stable representation of that colour in  
212 the MEG signal. For example, if we see a yellow banana, the banana shape may facilitate a  
213 stable representation of the colour yellow earlier than if we see a yellow strawberry. To assess  
214 this possibility, we trained the classifier to distinguish between the surface colours of the  
215 abstract shapes (i.e., red, orange, yellow, green, chance: 25%). We then tested how well the  
216 classifier could predict the colour of the congruent and incongruent objects. Training the  
217 classifier on the same abstract shapes across colour categories makes it impossible that a  
218 certain shape-colour combination drives an effect, as the distinguishing feature between the  
219 abstract shapes is colour. This analysis allows us to compare whether the typicality of colour-  
220 form combinations has an effect on colour processing.

221         Third, we tested whether the conjunction of object and colour has an effect on object  
222 decoding. If object-colour influences early perceptual processes, we might see a facilitation  
223 for decoding objects when they are coloured congruently or interference when the objects are  
224 coloured incongruently. We used the greyscale object trials to train the classifier to distinguish

225 between all of the objects. The stimulus set contained two exemplars of each item (e.g.,  
226 strawberry 1 and strawberry 2). We used different exemplars for the training and testing set  
227 to minimise the effects of low-level visual features, however, given that there are major  
228 differences in object shapes and edges we can still expect to see strong differences between  
229 the objects. The classifier was trained on one exemplar of all of the greyscale trials. We then  
230 tested the classifier's performance on the congruent and incongruent object trials using the  
231 exemplars the classifier did not train on. We then swapped the exemplars used for training  
232 and testing set until every combination had been used in the testing set. Essentially, this  
233 classifier is trained to predict which object was presented to the participant (e.g., was it a  
234 strawberry or a frog?) and we are testing whether there is a difference depending on whether  
235 the object is congruently or incongruently coloured.

236 In addition to our main analyses, we also conducted additional decoding analyses to  
237 replicate and extend an earlier study testing the timecourse of colour processing (Teichmann,  
238 Grootswagers, Carlson, & Rich, 2019). We tested whether colour representations accessed  
239 via perception (i.e., coloured abstract shapes) and via associations (i.e., greyscale objects  
240 associated with a colour) evoke similar neural patterns. The results from these additional  
241 analyses are summarised in the supplementary materials.

242 *Statistical Tests.* In all our analyses, we used random effects Monte-Carlo cluster  
243 statistic using Threshold Free Cluster Enhancement (TFCE, Smith & Nichols, 2009) as  
244 implemented in the CoSMoMVPA toolbox to see whether the classifier could predict the  
245 decisions above chance. The TFCE statistic represents the support from neighbouring time  
246 points, thus allowing for detection of sharp peaks and sustained small effects over time. We  
247 used a permutation test, swapping labels of complete trials, and re-ran the decoding analysis  
248 on the data with the shuffled labels 100 times per participant to create subject-level null-  
249 distributions. We then used Monte-Carlo sampling to create a group-level null-distribution  
250 consisting of 10,000 shuffled label permutations for the time-resolved decoding, and 1000 for

251 the time-generalisation analyses (to reduce computation time). The null distributions were then  
252 transformed into TFCE statistics. To correct for multiple comparisons, the *maximum* TFCE  
253 values across time in each of the null distributions was selected. We then transformed the true  
254 decoding values to TFCE statistics. To assess whether the true TFCE value at each timepoint  
255 is significantly above chance, we compared it to the 95<sup>th</sup> percentile of the corrected null  
256 distribution. Selecting the maximum TFCE value provides a conservative threshold for  
257 determining whether the observed decoding accuracy is above chance, corrected for multiple  
258 comparisons.

259

260

## Results

261 *Behavioural results.* We first present the behavioural data to confirm that our stimuli  
262 induce a congruency effect on object naming times. All incorrect responses and microphone  
263 errors were excluded from analysis (on average across participants: 10.1%). We then  
264 calculated the median reaction time for naming each stimulus. If a participant named a specific  
265 stimulus incorrectly across trials (e.g., incongruently coloured strawberry was always named  
266 incorrectly), we removed this stimulus completely to ensure that the reaction times in one  
267 condition were not skewed (on average this occurred in 5.4% of cases). Participants were  
268 faster to name the congruently coloured (702ms) than incongruently coloured (750ms) objects  
269 ( $t(17) = 4.06$ ,  $p < .001$ ; 95% CI [22.9, 72.7]). This suggests that the objects we used here do  
270 indeed have associations with specific canonical colours, and we replicate the effect of colour  
271 congruency on recognition of these objects (Bannert & Bartels, 2013; Joseph, 1997; Lloyd-  
272 Jones et al., 2012; Naor-Raz et al., 2003; Tanaka & Presnell, 1999; Therriault et al., 2009).

273 In the main task, participants were asked to indicate every 80 trials whether they had  
274 seen a certain target object or not. The aim of this task was to keep participants motivated  
275 and attentive throughout the training session. On average, participants reported whether the  
276 targets were present or absent with 90% accuracy (SD = 5%, range: 81.25% - 100%).

277 *MEG decoding results.* The aim of our decoding analyses was to examine the  
278 interaction between object-colour knowledge and object representations. First, we tested for  
279 a difference in the brain activation pattern for congruently and incongruently coloured objects.  
280 The results show distinct patterns of neural activity for congruent compared to incongruent  
281 objects in a cluster stretching from 265 to 330ms after stimulus onset, demonstrating that brain  
282 activity is modulated by colour congruency in this time window (Figure 2B). Thus, binding of  
283 colour and form must have occurred by ~265ms.

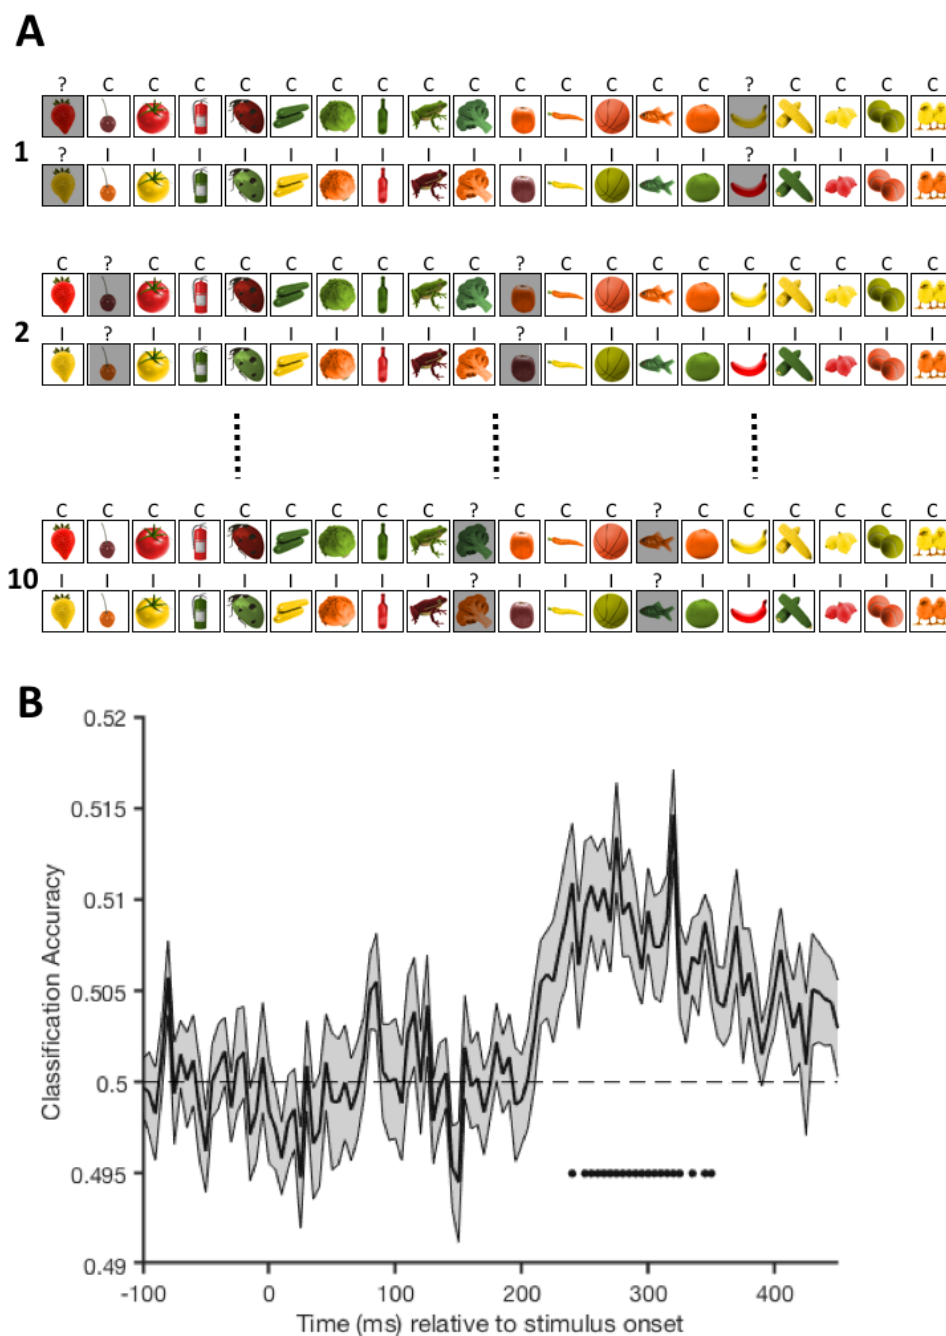

284

285 Figure 2. Cross-validation and results of the congruency analysis contrasting trials from the  
286 congruent and incongruent conditions. (A) shows the leave-one-matched-exemplar-out cross  
287 validation approach used for the congruency decoding analysis. The classifier was trained on  
288 the trials shown in clear squares and then tested on the trials shaded grey (actual stimuli were  
289 all clear), ensuring that the classifier is not tested on the exemplars that it trained on. This  
290 limits the effect features other than congruency can have on classifier performance. (B) shows  
291 the classification accuracy over time. Shading represents the standard error across  
292 participants. Black dashed line represents chance level (50% - congruent versus incongruent).  
293 Black dots highlight significant timepoints, corrected for multiple comparisons.

294  
295

296 To assess whether congruency influences colour perception, we trained a classifier to  
297 distinguish between the colours in the abstract shape condition and then tested it on the  
298 congruent and incongruent trials separately (see supplementary materials for further colour  
299 decoding analyses). Colour can be successfully classified in a cluster stretching from 75 to  
300 125ms for the congruent condition and in a cluster stretching from 75 to 185ms for the  
301 incongruent trials (Figure 3A). These results suggest there is a qualitative difference between  
302 the way colour information is processed depending on the congruency of the image. To assess  
303 how these signals evolves over time, we used time-generalisation matrices (Figure 3B and  
304 3C). Colour category was decodable from both conditions early on (~70ms) but in the  
305 incongruent condition, the activation associated with colour seems to be sustained longer  
306 (Figure 3C) than for the congruent condition (Figure 3B). This suggests that colour signals are  
307 prolonged when object-colour combinations are unusual relative to when they are typical.



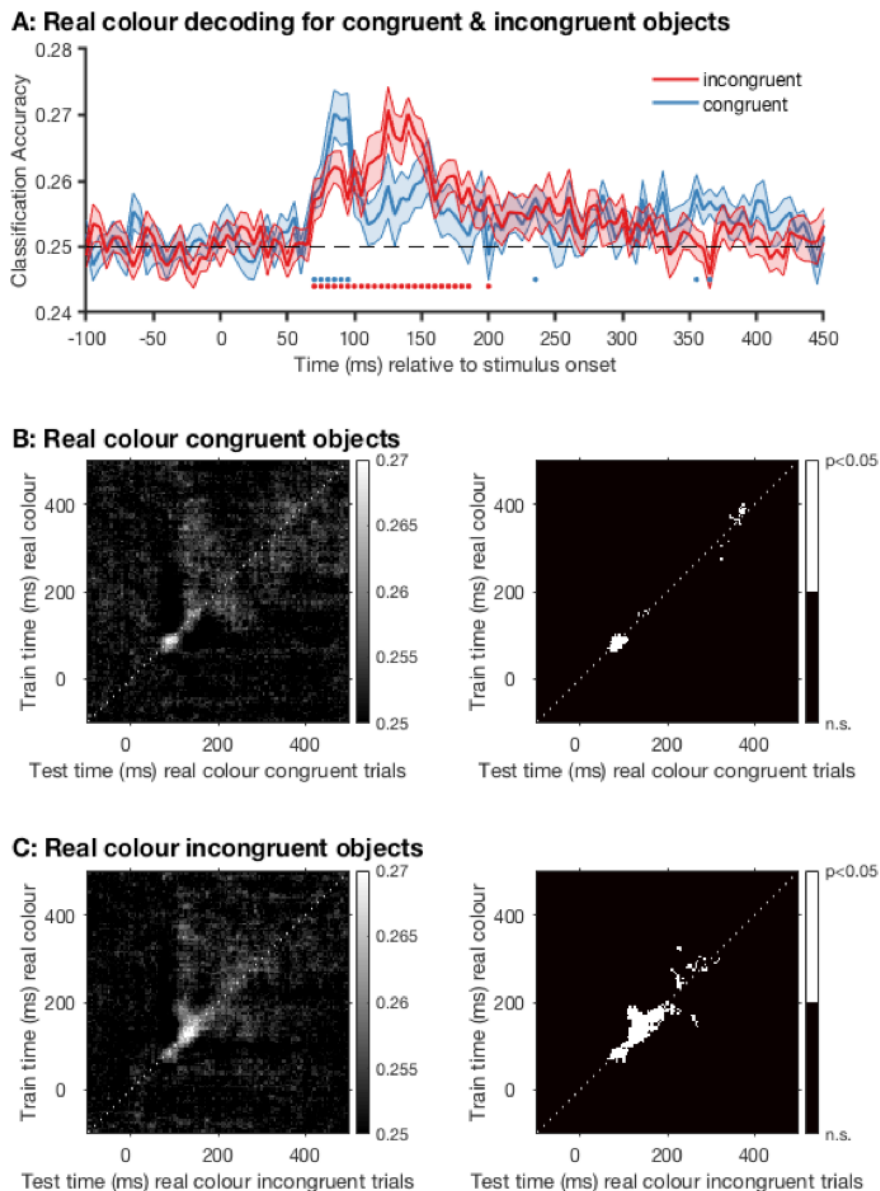

308

309 Figure 3. Results of the colour decoding analysis for the congruent and incongruent trials.  
310 Here, the classifier was trained to distinguish the colour of all abstract shape trials and tested  
311 on the congruent and incongruent trials separately. (A) shows the classification accuracy over  
312 time for this analysis. Red indicates the classifier's performance when it was tested on  
313 incongruent trials and blue indicates the classifier's performance when it was tested on  
314 congruent trials. Shading represents the standard error. Black dashed line indicates chance  
315 level (25% - red versus green versus orange versus yellow). Red (incongruent) and blue  
316 (congruent) dots highlight significant timepoints, corrected for multiple comparisons. (B) and  
317 (C) show the results of the same analysis across all possible training and testing timepoint  
318 combinations. These time-time matrices allow us to examine how the signal for the congruent  
319 colours (B) and incongruent colours (C) evolves over time. The plots on the left show the  
320 classification accuracy at every timepoint combination with lighter pixels reflecting higher  
321 decoding accuracies. The plots on the right show clusters where decoding is significantly  
322 above chance, corrected for multiple comparisons.

323



324           The goal of the third analysis was to examine whether shape representations are  
325 affected by colour congruency. We trained a classifier to distinguish between trials in which  
326 the participant saw one of the exemplars of each of the twenty objects in greyscale (e.g.,  
327 greyscale strawberry 1, greyscale cherry 1, etc.). We then tested at which timepoint the  
328 classifier could successfully cross-generalise to the other exemplar of that object in the  
329 congruent and incongruent condition separately. Note that although the exact images are  
330 unique, there are shared shape characteristics between exemplars (e.g., the two frog  
331 exemplars share some shape aspects despite being different postures) which can be  
332 expected to drive the classifier's performance. The results show the neural data has  
333 differential information about the object in a cluster stretching from 80 to 450ms for the  
334 congruent test set and from 90 to 450ms for the incongruent test set (Figure 4A). These  
335 results show that we can decode the object category early on, consistent with the classifier  
336 being driven by low-level visual features such as shape or texture. The timecourse for  
337 congruent and incongruent exemplar decoding is very similar, suggesting that colour  
338 congruency does not affect the initial stages of object processing. On error trials, we can see  
339 whether the classifier makes the same mistakes when decoding congruent and incongruent  
340 stimuli. Figure 4B shows these errors, averaged across timepoints when the decoding was  
341 significant. Figure 4C shows a high correlation between the resulting confusion matrices. This  
342 demonstrates that the particular classification errors in congruent and incongruent conditions  
343 are highly similar, reflecting shape effects rather than colour congruency effects. Thus, we  
344 have no evidence that early stages of object processing are affected by colour congruency.

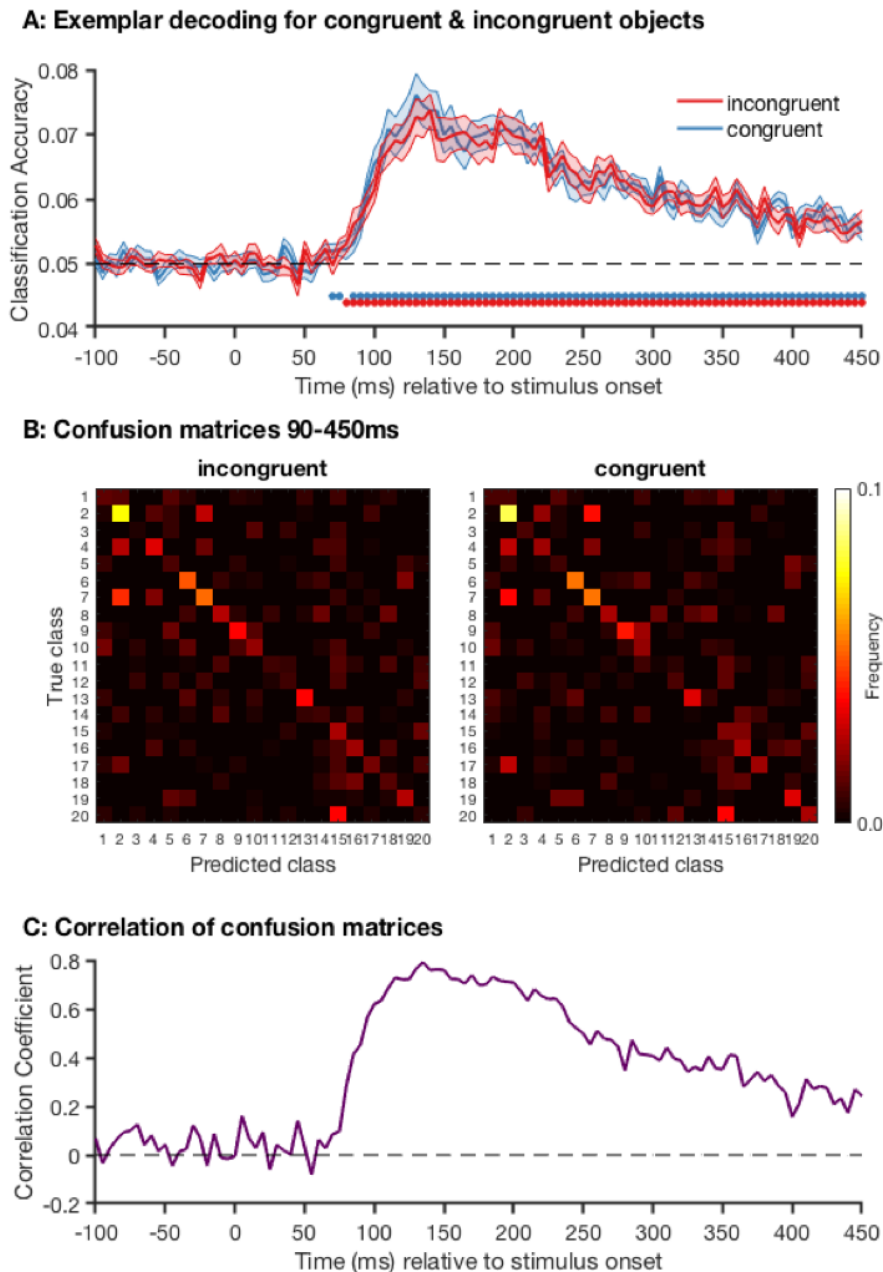

345

346 Figure 4. Results of the object exemplar decoding analysis. The classifier was trained to  
347 distinguish between all object categories in the greyscale object condition. We used one  
348 exemplar of each class for the training and the other exemplar for testing the classifier. Testing  
349 was done for the congruent and incongruent trials separately. (A) shows the classification  
350 accuracy over time for the exemplar decoding analysis. The red line shows the classifier  
351 accuracy when testing the classifier on incongruent trials and blue shows the classifier  
352 accuracy when testing the classifier on congruent trials. Shading represents the standard  
353 error. Black dashed line represents chance level (5% - 20 different object categories). Red  
354 (incongruent) and blue (congruent) dots highlight significant timepoints ( $p < 0.05$ ), corrected for  
355 multiple comparisons. (B) shows the confusion matrices for the incongruent (left) and  
356 congruent (right) condition. The confusion matrices were averaged across time (90-450ms).  
357 The true object categories are plotted on the y-axis and the predicted categories on the x-axis.  
358 The colour highlights the frequency of a specific category being predicted in response to a

359 given category. The diagonal shows accurate classifier prediction (match between predicted  
360 and true category). (C) shows the correlation of the two confusion matrices over time.  
361

362

363

## Discussion

364 A crucial question in object recognition is how incoming visual information interacts  
365 with stored object concepts to create meaningful vision under varying situations. The aims of  
366 the current study were to examine the temporal dynamics of object-colour knowledge and to  
367 test whether activating object-colour knowledge influences early stages of colour and object  
368 processing. Our data provide three major insights: First, congruently and incongruently  
369 coloured objects evoke a different neural representation after ~260ms suggesting that by this  
370 time, visual object features are bound into a coherent representation and compared to stored  
371 object representations. Second, compared with the latency at which congruency decoding is  
372 possible, the congruency of the object-colour binding does seem to affect colour processing  
373 earlier in the signal. This indicates that there is some information about the “correctness” of  
374 an object’s colour even in the early stages of processing. Third, we find no evidence that the  
375 congruency of object-colour binding affects shape processing, suggesting behavioural  
376 congruency effects are due to conflict at a later stage in processing.

377 Here, we use colour congruency as an index to assess when prior knowledge is  
378 integrated with bound object features. When comparing brain activation patterns of the same  
379 objects presented in different colours, there was a decodable difference between congruent  
380 and incongruent conditions from 265ms onwards suggesting that a stored object  
381 representation containing information about the typical colour of an object must have been  
382 activated at that stage. Prior to this time, the signal is primarily driven by early perceptual  
383 features such as colour and shape, which were matched for the congruent and incongruent  
384 conditions (same objects, same colours, only the binding of colour and shape differed). Thus,  
385 our data illustrate the classic hierarchy of vision with single features being processed first and

386 the conjunction of colour and shape occurring at a later stage. These timecourse data do not  
387 speak to which brain areas are involved in the integration of colour and shape information,  
388 which has already been explored by the fMRI literature, instead our congruency analysis  
389 shows the relative timecourse at which different features are bound together and a meaningful  
390 object representation emerges. These results are consistent with previous work showing that  
391 simple colour processes such as registering the intensity of light occurs in early visual areas  
392 such as V1 and V2, while more complex colour-related processes such as distinguishing  
393 between object surface colours occur in V4 and beyond (Seymour, Williams, & Rich, 2015;  
394 Zeki & Marini, 1998). Activating object colour from memory has been shown to involve the  
395 ATL (e.g., Coutanche & Thompson-Schill, 2014) and coding for object-colour congruency has  
396 involves perirhinal cortex (Price, Bonner, Peelle, & Grossman, 2017). Further support on the  
397 involvement of the ATL in the integration of information, such as colour and shape, comes  
398 from work on patients with semantic dementia (e.g., Bozeat, Lambon Ralph, Patterson, &  
399 Hodges, 2002) and studies on healthy participants using TMS (e.g., Chiou et al., 2014). The  
400 latency of congruency decoding in our data may reflect the process of comparing bound  
401 perceptual object features with a conceptual template representation of the object in higher-  
402 level brain areas such as the ATL.

403 Our results also show that the “correctness” of an object’s colour has an effect on  
404 colour processing. We found colour decoding onset at a similar time (~70ms) for congruently  
405 and incongruently coloured objects, however, colours were decodable longer in the  
406 incongruent condition than the congruent condition (Figure 3A). Thus, early on colour is  
407 processed in a similar way for congruently and incongruently coloured objects, but after the  
408 initial, early colour processing, colour information persists only in the incongruent condition. It  
409 is possible that this different dynamic in colour processing is driven by certain colours co-  
410 occurring more often with other low-level features such as texture, edges or degree of  
411 curvature. We presumably learn these regularities from repeated exposure over the lifespan

412 (e.g., Clarke & Tyler, 2015). If there is a conflict between the actual colour and the “most likely”  
413 colour, it may lead to the prolonged colour signal which we observed here.

414         The timecourse of exemplar decoding we observe is consistent with previous studies  
415 on object recognition. Here, we found that exemplar identity could be decoded at ~90ms  
416 (Figure 4A). Similar latencies have been found in other M/EEG decoding studies (Carlson,  
417 Tovar, Alink, & Kriegeskorte, 2013; Cichy, Pantazis, & Oliva, 2014; Contini, Wardle, & Carlson,  
418 2017; Grootswagers, Robinson, & Carlson, 2019; Isik, Meyers, Leibo, & Poggio, 2013) and  
419 single unit recordings (e.g., Hung, Kreiman, Poggio, & DiCarlo, 2005). Behavioural data,  
420 including the reaction times collected here in our participants, show that colour influences  
421 object identification speed (e.g., Bramão, Faísca, Petersson, & Reis, 2010). The neural data,  
422 however, did not show an effect of object colour on the classifier’s performance when  
423 distinguishing the neural activation patterns evoked by different objects. For example, the  
424 brain activation pattern in response to a strawberry could be differentiated from the pattern  
425 evoked by a lemon, without any influence of the congruency of their colours. This suggests  
426 that colour and shape processing affect each other in an asymmetric way: colour  
427 representations are influenced by object shape, perhaps due to statistical learning through  
428 experience, but shape representations are not influenced by colour. This finding is consistent  
429 with previous results (Proverbio et al., 2004) but might seem puzzling because colour  
430 congruency has been shown to have a strong effect on object naming (e.g., Chiou et al.,  
431 2014; Nagai & Yokosawa, 2003; Tanaka & Presnell, 1999). It seems plausible, however, that  
432 the typicality between object and colour combination affects later stages of processing as seen  
433 in our congruency analysis, rather than influencing these early stages. For example, the  
434 source of behavioural congruency effects may be at the stage of response selection, which  
435 would not show up in these early neural signals. More exploration is needed to test this  
436 interpretation, but the current data suggest that colour congruency does not have an impact  
437 on early stages of shape processing.

438           Our study demonstrates that object representations are influenced by object-colour  
439 knowledge but not at the initial stages of visual processes. Our data also suggest that colour  
440 processing is affected by colour congruency, with colour signals being extended for  
441 incongruently in comparison to congruently coloured objects. Our findings document the  
442 timecourse of the processes suggested by the traditional hierarchical view of vision, in which  
443 single object features are processed before the features are bound into a coherent object that  
444 can be compared with existing, conceptual object representations. We find that object-colour  
445 binding is complete by ~265ms, clearly demonstrating an interaction between our knowledge  
446 of the world and incoming information to form our visual perception.  
447

## References

- Albright, T. D. (2012). On the perception of probable things: Neural substrates of associative memory, imagery, and perception. *Neuron*, *74*(2), 227–245.
- Bannert, M. M., & Bartels, A. (2013). Decoding the yellow of a gray banana. *Current Biology*, *23*(22), 2268–2272.
- Bozeat, S., Lambon Ralph, M. A., Patterson, K., & Hodges, J. R. (2002). When objects lose their meaning: What happens to their use? *Cognitive, Affective, & Behavioral Neuroscience*, *2*(3), 236–251.
- Brainard, D. H. (1997). The psychophysics toolbox. *Spatial Vision*, *10*, 433–436.
- Brainard, D. H., & Pelli, D. G. (1997). The psychophysics toolbox. *Spatial Vision*, *10*, 433–436.
- Bramão, I., Faísca, L., Petersson, K. M., & Reis, A. (2010). The influence of surface color information and color knowledge information in object recognition. *The American Journal of Psychology*, *123*(4), 437–446.
- Carlson, T. A., Hogendoorn, H., Kanai, R., Mesik, J., & Turret, J. (2011). High temporal resolution decoding of object position and category. *Journal of Vision*, *11*(10), 9–9. <https://doi.org/10.1167/11.10.9>
- Carlson, T. A., Tovar, D. A., Alink, A., & Kriegeskorte, N. (2013). Representational dynamics of object vision: The first 1000 ms. *Journal of Vision*, *13*(10), 1–1.
- Chiou, R., Sowman, P. F., Etchell, A. C., & Rich, A. N. (2014). A conceptual lemon: Theta burst stimulation to the left anterior temporal lobe untangles object representation and its canonical color. *Journal of Cognitive Neuroscience*, *26*(5), 1066–1074.
- Cichy, R. M., Pantazis, D., & Oliva, A. (2014). Resolving human object recognition in space and time. *Nature Neuroscience*, *17*(3), 455.
- Clarke, A., & Tyler, L. K. (2015). Understanding what we see: How we derive meaning from vision. *Trends in Cognitive Sciences*, *19*(11), 677–687.

- Contini, E. W., Wardle, S. G., & Carlson, T. A. (2017). Decoding the time-course of object recognition in the human brain: From visual features to categorical decisions. *Neuropsychologia*. <https://doi.org/10.1016/j.neuropsychologia.2017.02.013>
- Coutanche, M. N., & Thompson-Schill, S. L. (2014). Creating concepts from converging features in human cortex. *Cerebral Cortex*, *25*(9), 2584–2593.
- Grootswagers, T., Robinson, A. K., & Carlson, T. A. (2019). The representational dynamics of visual objects in rapid serial visual processing streams. *NeuroImage*, *188*, 668–679.
- Hebart, M. N., & Baker, C. I. (2018). Deconstructing multivariate decoding for the study of brain function. *Neuroimage*, (180), 4–18.
- Hung, C. P., Kreiman, G., Poggio, T., & DiCarlo, J. J. (2005). Fast readout of object identity from macaque inferior temporal cortex. *Science*, *310*(5749), 863–866.
- Isik, L., Meyers, E. M., Leibo, J. Z., & Poggio, T. (2013). The dynamics of invariant object recognition in the human visual system. *Journal of Neurophysiology*, *111*(1), 91–102. <https://doi.org/10.1152/jn.00394.2013>
- Joseph, J. E. (1997). Color processing in object verification. *Acta Psychologica*, *97*(1), 95–127.
- King, J. R., & Dehaene, S. (2014). Characterizing the dynamics of mental representations: The temporal generalization method. *Trends in Cognitive Sciences*, *18*(4), 203–210.
- Kleiner, M., Brainard, D., Pelli, D., Ingling, A., Murray, R., Broussard, C., & others. (2007). What's new in Psychtoolbox-3. *Perception*, *36*(14), 1.
- Lambon Ralph, M. A., Jefferies, E., Patterson, K., & Rogers, T. T. (2017). The neural and computational bases of semantic cognition. *Nature Reviews Neuroscience*, *18*(1), 42.
- Lloyd-Jones, T. J., Roberts, M. V., Leek, E. C., Fouquet, N. C., & Truchanowicz, E. G. (2012). The time course of activation of object shape and shape+ colour representations during memory retrieval. *PloS One*, *7*(11), e48550.



- Lu, A., Xu, G., Jin, H., Mo, L., Zhang, J., & Zhang, J. X. (2010). Electrophysiological evidence for effects of color knowledge in object recognition. *Neuroscience Letters*, *469*(3), 405–410.
- Maris, E., & Oostenveld, R. (2007). Nonparametric statistical testing of EEG-and MEG-data. *Journal of Neuroscience Methods*, *164*(1), 177–190.
- Nagai, J., & Yokosawa, K. (2003). What regulates the surface color effect in object recognition: Color diagnosticity or category. *Technical Report on Attention and Cognition*, *28*, 1–4.
- Naor-Raz, G., Tarr, M. J., & Kersten, D. (2003). Is color an intrinsic property of object representation? *Perception*, *32*(6), 667–680.
- Oostenveld, R., Fries, P., Maris, E., & Schoffelen, J.-M. (2011). FieldTrip: Open source software for advanced analysis of MEG, EEG, and invasive electrophysiological data. *Computational Intelligence and Neuroscience*, *2011*, 1.
- Oosterhof, N. N., Connolly, A. C., & Haxby, J. V. (2016). CoSMoMVPA: Multi-modal multivariate pattern analysis of neuroimaging data in Matlab/GNU Octave. *Frontiers in Neuroinformatics*, *10*. Retrieved from <https://www.ncbi.nlm.nih.gov/pmc/articles/PMC4956688/>
- Patterson, K., Nestor, P. J., & Rogers, T. T. (2007). Where do you know what you know? The representation of semantic knowledge in the human brain. *Nature Reviews Neuroscience*, *8*(12), 976.
- Pobric, G., Jefferies, E., & Lambon Ralph, M. A. (2010). Amodal semantic representations depend on both anterior temporal lobes: Evidence from repetitive transcranial magnetic stimulation. *Neuropsychologia*, *48*(5), 1336–1342.
- Price, A. R., Bonner, M. F., Peelle, J. E., & Grossman, M. (2017). Neural coding of fine-grained object knowledge in perirhinal cortex. *BioRxiv*, 194829.

Proverbio, A. M., Burco, F., del Zotto, M., & Zani, A. (2004). Blue piglets?

Electrophysiological evidence for the primacy of shape over color in object recognition. *Cognitive Brain Research*, *18*(3), 288–300.

<https://doi.org/10.1016/j.cogbrainres.2003.10.020>

Seymour, K. J., Williams, M. A., & Rich, A. N. (2015). The representation of color across the human visual cortex: Distinguishing chromatic signals contributing to object form versus surface color. *Cerebral Cortex*, *26*(5), 1997–2005.

Smith, S. M., & Nichols, T. E. (2009). Threshold-free cluster enhancement: Addressing problems of smoothing, threshold dependence and localisation in cluster inference. *Neuroimage*, *44*(1), 83–98.

Tanaka, J. W., & Presnell, L. M. (1999). Color diagnosticity in object recognition. *Perception & Psychophysics*, *61*(6), 1140–1153. <https://doi.org/10.3758/BF03207619>

Teichmann, L., Grootswagers, T., Carlson, T., & Rich, A. N. (2019). Seeing versus knowing: The temporal dynamics of real and implied colour processing in the human brain. *NeuroImage*.

Therriault, D. J., Yaxley, R. H., & Zwaan, R. A. (2009). The role of color diagnosticity in object recognition and representation. *Cognitive Processing*, *10*(4), 335.

Willenbockel, V., Sadr, J., Fiset, D., Horne, G. O., Gosselin, F., & Tanaka, J. W. (2010). Controlling low-level image properties: The SHINE toolbox. *Behavior Research Methods*, *42*(3), 671–684.

Zeki, S., & Marini, L. (1998). Three cortical stages of colour processing in the human brain. *Brain: A Journal of Neurology*, *121*(9), 1669–1685.

## Supplementary Materials

In addition to the main analyses we also tested whether colour representations that are accessed via perception and via association could be decoded using our methods. Below, we summarise these results.

### *Real colour analysis*

For the real colour analysis, we trained the classifier to distinguish between MEG data when participants viewed the abstract shapes in different colours and tested its performance on independent real colour trials. We found that most of the colour pairs could be decoded from ~70ms after stimulus onset (Figure S1B). Yellow versus green trials could be differentiated later on in the signal (~115ms) but the colour representation was not stable (Figure 2B). Red versus orange could not be decoded, probably reflecting the high similarity between these colours (Figure S1B). Note that the decoding accuracy might be influenced by luminance differences which are smaller in the case of red versus orange and yellow versus green than in all the other colour pairs (unlike in our previous study (Teichmann et al., 2019) in which the colours were equiluminant). Peak decoding for the remaining real colour pairs was at ~135-150ms after stimulus onset (Figure S1).

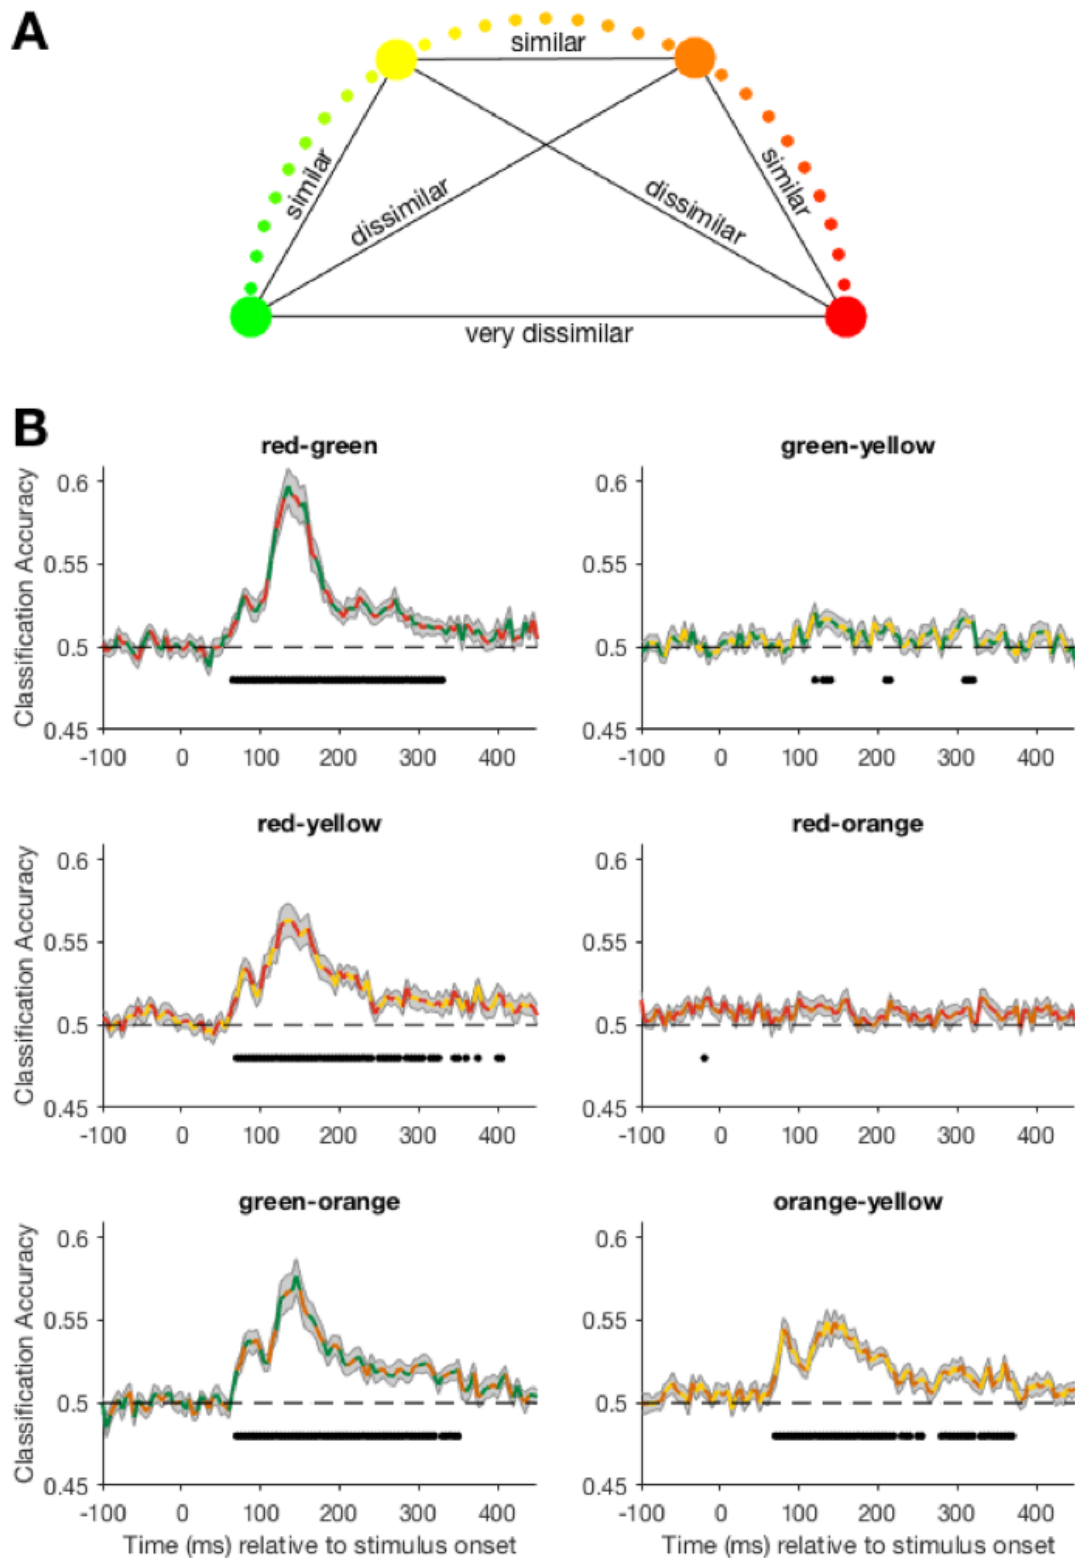

Figure S1. (A) shows the similarity between colour categories based on colour distance. (B) shows the results of the real colour decoding analysis for all colour pairs. The classifier was trained on the abstract shape trials to distinguish between two colours at a time. Each colour category contained identical shapes. The classifier was trained to distinguish between all shapes except one. Testing was done only on the shape that the classifier did not train on.

The classification accuracy over time for the real colour decoding analysis for each colour pair is plotted above. Shading represents the standard error. Black dashed line represents chance level (50% - pairwise comparison). Black dots highlight significant timepoints for each pairwise comparison ( $p < 0.05$ ), corrected for multiple comparisons.

### Implied colour analysis

A controlled approach of testing whether there is any representational overlap between real and implied colours is to train a classifier on real colour and test on implied colour trials. For this analysis, there is no low-level feature such as shape or luminance that could drive the classification. Successful cross-generalisation implies that the brain representation of colour accessed via colour perception and association share characteristics. To see whether this is the case, we trained a classifier to distinguish between patterns evoked by pairs of our coloured abstract shapes, as in our first analysis. We then tested the classifier on distinguishing between the grey-scale objects that are associated with those colours. Consistent with our previous work (Teichmann et al., 2019), the representational overlap for real and implied colours dynamically evolved over time. We therefore ran this analysis as a time-generalisation analysis, training and testing the classifier at every timepoint combination (Carlson et al., 2011; King & Dehaene, 2014). We ran the analysis separately for each of the colour pairs as the real colour decoding results showed that the classifier cannot reliably distinguish all colour pairs (Figure S1). Across the time-time decoding matrices (Figure S2), we can see that the classifier can cross-generalise best between real and implied colours when the colours are most dissimilar (i.e., red and green). Accessing colour via real colour perception and implied colour activation occurred at the same time, around 150ms. For red versus green, there was additional significant decoding off the diagonal, which indicates a temporal difference in the instantiation of a similar pattern. Colour information evoked by real colours from ~150ms-450ms resembles colour information evoked by greyscale objects in a timewindow from ~150-170ms after stimulus onset. This indicates that colour information evoked by association is only briefly in the signal. There also is a reactivation of colour

information for the red-green comparison at ~400ms after stimulus onset. For the red versus yellow and green versus orange contrast there is cross-generalisation in a timewindow around ~150ms after stimulus onset. In contrast, we did not observe successful cross-generalisation when training and testing on colours that are similar. This is not surprising given that we did not have a reliable model to distinguish between these real colours (i.e., red versus orange, Figure S1).

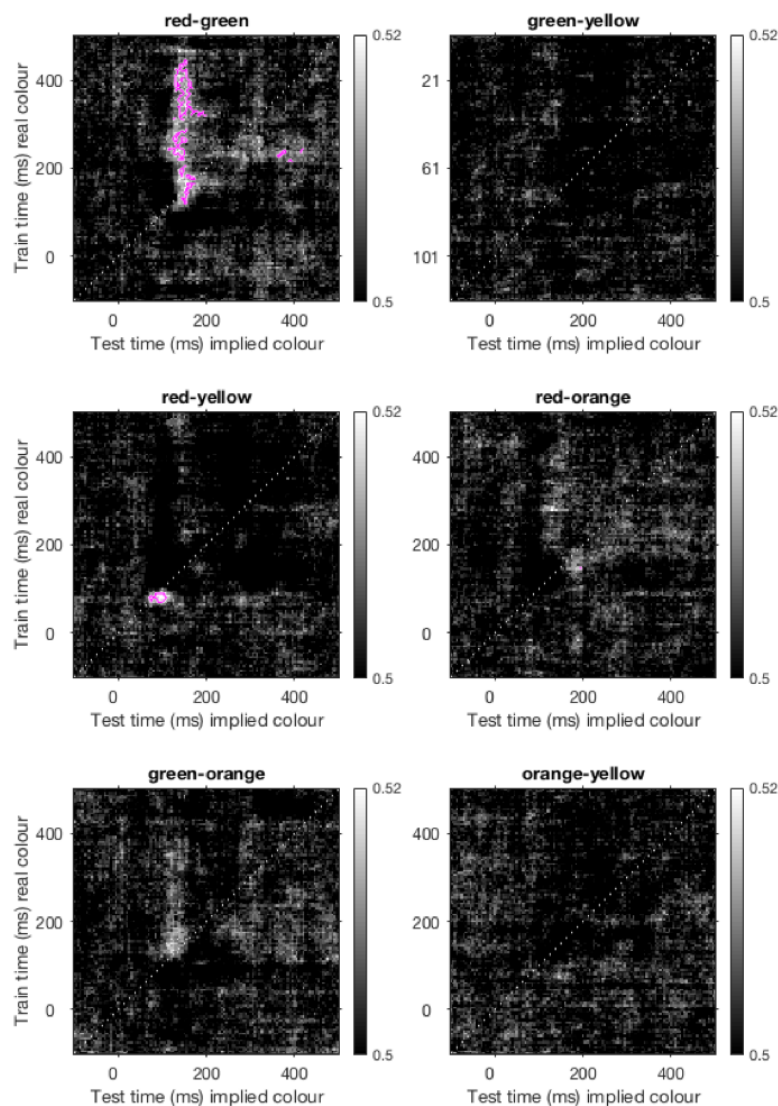

Figure S2. Time-generalisation for cross-decoding, training the classifier on real colour trials and testing on grey-scale object trials. The analysis was done separately for each pairwise colour comparison. The plots in show the decoding accuracies for every timepoint combination when training on abstract shapes and testing on greyscale object trials. Pink highlights show timepoints with decoding significantly above chance ( $p < 0.05$ ), controlled for multiple comparisons.

Overall, our results show that there are representational similarities for real and implied colours but this is only distinguishable using our methods for colours that are quite dissimilar (e.g., red and green). It is important to note that there is no colour information at all in the equiluminant greyscale object trials and that the shapes used for training the classifier are identical except in colour and luminance. That means we here have strong evidence for real and implied colour sharing an overlapping brain activation pattern that becomes apparent from around 150 to 200ms after stimulus onset, at least when the colours are dissimilar enough.
